# Supplementary material for: Assessment of Diagnostic Value of Serum Ceruloplasmin for Wilson’s Disease in Children
Source: Research Square preprint supplement (doi:10.21203/rs.3.rs-708206/v1), 2021-08-30
Supplement: Supplementary file 1 [file a714acb0abde86e7cbaadf20.xlsx]

## Sheet: Healthy children
Male	Female	Name	Age (years)	CER（mg/dL)
1		H1	0.0219178	17
1		H2	0.0273973	35
	1	H3	0.0356164	13
1		H4	0.0383562	12
1		H5	0.0739726	26
	1	H6	0.0860731	15
1		H7	0.0860731	13
	1	H8	0.11621	9
1		H9	0.157306	27
1		H10	0.166667	23.9
1		H11	0.166667	29
	1	H12	0.208333	23
	1	H13	0.282877	36
1		H14	0.325	39.9
1		H15	0.347032	48
1		H16	0.355251	28
1		H17	0.36895	27
	1	H18	0.379909	23
1		H19	0.471461	30
	1	H20	0.48516	36
1		H21	0.495833	27.7
1		H22	0.521918	36
	1	H23	0.535616	32
1		H24	0.583333	31.1
1		H25	0.583333	31.1
	1	H26	0.629909	32
1		H27	0.641667	19
1		H28	0.660046	31
	1	H29	0.696804	39
1		H30	0.771918	42
1		H31	0.780137	29
	1	H32	0.808333	19
1		H33	0.841553	41
1		H34	0.841553	45
1		H35	0.933105	42
1		H36	0.935833	36
	1	H37	0.938584	40
	1	H38	0.938584	50
	1	H39	0.975	26
	1	H40	0.976941	11
	1	H41	1	43
	1	H42	1.16667	43.4
1		H43	1.16667	30
1		H44	1.19167	35.9
	1	H45	1.25	42
	1	H46	1.25	30
1		H47	1.25	40
	1	H48	1.33333	18
1		H49	1.33333	24
	1	H50	1.41667	36.3
	1	H51	1.5	34
	1	H52	1.5	25.9
1		H53	1.5	34
	1	H54	1.58333	20
	1	H55	1.58333	30
	1	H56	1.58333	30
1		H57	1.58333	23
	1	H58	1.6	34
	1	H59	1.66667	17
1		H60	1.66667	16
	1	H61	1.75	38.7
	1	H62	1.75	23
	1	H63	1.75	38.7
1		H64	1.75	32
	1	H65	1.83333	35
1		H66	1.83333	43
1		H67	1.85417	29.9
1		H68	1.9125	35
	1	H69	2	39.9
1		H70	2	28
1		H71	2	33
1		H72	2.16667	30
1		H73	2.16667	8
1		H74	2.16667	13
	1	H75	2.25	37
	1	H76	2.25	37
	1	H77	2.33333	35
1		H78	2.33333	26
	1	H79	2.41667	33
1		H80	2.41667	30.4
	1	H81	2.5	32
1		H82	2.5	42
1		H83	2.5	27.4
	1	H84	2.58333	38
1		H85	2.66667	20
	1	H86	2.74167	31
1		H87	2.75	30
1		H88	2.75	39
	1	H89	2.83333	20
	1	H90	2.875	29.2
	1	H91	3	26
	1	H92	3	36
1		H93	3	28.6
1		H94	3	34
1		H95	3	35
1		H96	3.16667	44
	1	H97	3.25	31
	1	H98	3.33333	23
	1	H99	3.41667	30
1		H100	3.41667	42
1		H101	3.41667	34
	1	H102	3.5	40
1		H103	3.5	37
1		H104	3.5	32
1		H105	3.58333	28
1		H106	3.58333	29
	1	H107	3.66667	38
1		H108	3.66667	39
	1	H109	3.83333	21
	1	H110	3.83333	36
1		H111	3.83333	30
1		H112	3.83333	31
	1	H113	3.91667	25
	1	H114	3.91667	19
	1	H115	4	41
1		H116	4	38
1		H117	4	46
1		H118	4	48
1		H119	4	37
1		H120	4	40
	1	H121	4.08333	27
1		H122	4.08333	31
	1	H123	4.16667	23
	1	H124	4.41667	34
1		H125	4.41667	36
1		H126	4.41667	27
1		H127	4.525	32.9
1		H128	4.61667	27.8
	1	H129	4.66667	29
1		H130	4.66667	32
1		H131	4.66667	40.1
1		H132	4.75	28
1		H133	4.75	30.8
1		H134	4.75	27
1		H135	4.82917	31.4
	1	H136	4.83333	27
1		H137	4.91667	28
1		H138	4.91667	38
1		H139	4.91667	42.1
	1	H140	5	28
1		H141	5	33
1		H142	5	42
1		H143	5	30
1		H144	5	32.1
1		H145	5	42
	1	H146	5.16667	31
	1	H147	5.16667	37
1		H148	5.225	26.3
1		H149	5.25	43
1		H150	5.25	30
1		H151	5.25	40
	1	H152	5.33333	22
	1	H153	5.33333	28
1		H154	5.33333	25
1		H155	5.33333	31
1		H156	5.34667	33
1		H157	5.35833	29
1		H158	5.41667	35
1		H159	5.5	40
1		H160	5.5	29
1		H161	5.58333	31
1		H162	5.58333	33.6
	1	H163	5.6025	37.8
	1	H164	5.63333	38.1
1		H165	5.63333	26.6
	1	H166	5.73833	31.3
1		H167	5.75	26
1		H168	5.75	23
	1	H169	5.83333	27
	1	H170	5.83333	31
	1	H171	5.91667	19
	1	H172	5.91667	34
1		H173	5.91667	32
1		H174	5.91667	34
	1	H175	6	28
	1	H176	6	31
	1	H177	6	31
	1	H178	6	41
1		H179	6	38
1		H180	6	31
1		H181	6	27.5
	1	H182	6.08333	42
	1	H183	6.08333	39
1		H184	6.08333	36
1		H185	6.16667	30
1		H186	6.19167	29
1		H187	6.25	31
	1	H188	6.33333	28
1		H189	6.41667	36
1		H190	6.41667	44.3
	1	H191	6.66667	29
1		H192	6.66667	39.8
	1	H193	6.75	31
	1	H194	6.75	31
1		H195	6.75	32
1		H196	6.83333	41
	1	H197	6.91667	27
	1	H198	6.95	35
1		H199	6.95	31.3
1		H200	6.95833	37
	1	H201	7	31
	1	H202	7	24
	1	H203	7	35
	1	H204	7	28
	1	H205	7	32
	1	H206	7	24
	1	H207	7	31
	1	H208	7	36
	1	H209	7	41
1		H210	7	36
1		H211	7	32
1		H212	7	36
1		H213	7	28
1		H214	7	24
1		H215	7	27.1
1		H216	7	28
1		H217	7	31
1		H218	7	32.7
1		H219	7	36
1		H220	7	44
	1	H221	7.21667	22.8
1		H222	7.32167	29.9
	1	H223	7.5	32
1		H224	7.83333	38
1		H225	7.91667	30
	1	H226	8	31
	1	H227	8	23
	1	H228	8	28
	1	H229	8	32
	1	H230	8	35
	1	H231	8	18
	1	H232	8	33
	1	H233	8	26
	1	H234	8	28
	1	H235	8	29
	1	H236	8	31
	1	H237	8	20
	1	H238	8	28
	1	H239	8	31
	1	H240	8	39
1		H241	8	29.3
1		H242	8	32.2
1		H243	8	34
1		H244	8	36
1		H245	8	36
1		H246	8	38
1		H247	8	41
1		H248	8	43
1		H249	8.18583	34
	1	H250	8.41667	25
	1	H251	8.41667	28
	1	H252	8.475	25
	1	H253	9	29
	1	H254	9	23
	1	H255	9	26
	1	H256	9	21
	1	H257	9	22
	1	H258	9	19
	1	H259	9	31
	1	H260	9	19
	1	H261	9	33
	1	H262	9	34
	1	H263	9	27
	1	H264	9	31
	1	H265	9	34
1		H266	9	38
1		H267	9	25
1		H268	9	23
1		H269	9	28
1		H270	9	29
1		H271	9	30.8
1		H272	9	32
1		H273	9	38.8
1		H274	9	43
	1	H275	10	18
	1	H276	10	13
	1	H277	10	11
	1	H278	10	32
	1	H279	10	25.3
	1	H280	10	41
1		H281	10	19
1		H282	10	11
1		H283	10	26
1		H284	10	30.6
1		H285	10	40.4
1		H286	10	43.4
1		H287	10	28.7
1		H288	10	38.5
1		H289	10	32.8
1		H290	10	38.8
1		H291	10	28
1		H292	10	39
1		H293	10	25
	1	H294	10.16	35
	1	H295	10.33	34
	1	H296	11	11
	1	H297	11	22
	1	H298	11	37
	1	H299	11	31
	1	H300	11	22.6
	1	H301	11	25.5
	1	H302	11	22
1		H303	11	6
1		H304	11	31
1		H305	11	23
1		H306	11	32
1		H307	11	22.4
1		H308	11	25
1		H309	11	32
1		H310	11	32
1		H311	11	36
1		H312	11	35
1		H313	11	36
1		H314	11	29.9
1		H315	11	32
1		H316	11	35
1		H317	11	23
	1	H318	11.8333	31
	1	H319	12	28
	1	H320	12	38
	1	H321	12	28
	1	H322	12	28
1		H323	12	20
1		H324	12	27
1		H325	12	28.1
1		H326	12	29
1		H327	12	29
1		H328	12	40
1		H329	12	31
1		H330	12	27
1		H331	12	30
1		H332	12	40
1		H333	12	67
1		H334	12	34
1		H335	12	41
1		H336	12	38
1		H337	12	35
1		H338	12	32
1		H339	12	27
1		H340	12.33	28
1		H341	12.5833	34
1		H342	12.6667	30
1		H343	12.8	22
	1	H344	13	27
	1	H345	13	19.5
	1	H346	13	20
	1	H347	13	22.8
	1	H348	13	40
1		H349	13	20.4
1		H350	13	24
1		H351	13	25.8
1		H352	13	29.2
1		H353	13	22.2
1		H354	13	23.8
1		H355	13	23.8
1		H356	13	31
1		H357	13	40
1		H358	13	30
1		H359	13.75	21
	1	H360	14	21
1		H361	14	16
1		H362	14	37
1		H363	14	43.1
1		H364	14	44
1		H365	14	29
1		H366	14	20.5
1		H367	14	37
1		H368	14	28
	1	H369	15	38
	1	H370	15	14.7
	1	H371	15	30
1		H372	15	19.8

## Sheet: WD-Asymptomatic
Male	Female	Name	Age (years)	CER（mg/dL)
	1	WD-Asym1	1.50411	7
	1	WD-Asym2	1.66849	2
	1	WD-Asym3	2.00274	4
1		WD-Asym4	2.0137	6
1		WD-Asym5	2.07123	3.9
1		WD-Asym6	2.12877	2
1		WD-Asym7	2.19452	2
1		WD-Asym8	2.23014	2
	1	WD-Asym9	2.29589	3
	1	WD-Asym10	2.41096	9.6
1		WD-Asym11	2.49315	3
1		WD-Asym12	2.56438	6
1		WD-Asym13	2.61096	2
1		WD-Asym14	2.6411	3
1		WD-Asym15	2.73973	9
1		WD-Asym16	2.75616	3.2
1		WD-Asym17	2.83288	2
	1	WD-Asym18	2.84932	3
	1	WD-Asym19	2.87123	15
	1	WD-Asym20	2.88493	6
	1	WD-Asym21	2.92329	2
1		WD-Asym22	2.99452	2
	1	WD-Asym23	3.00548	2.2
1		WD-Asym24	3.03288	3
1		WD-Asym25	3.05205	6
1		WD-Asym26	3.06027	3
	1	WD-Asym27	3.08493	3
1		WD-Asym28	3.10959	2
	1	WD-Asym29	3.11781	2
1		WD-Asym30	3.11781	2.6
	1	WD-Asym31	3.12055	4
1		WD-Asym32	3.14521	7
1		WD-Asym33	3.15068	5
1		WD-Asym34	3.15068	3
	1	WD-Asym35	3.1863	2
	1	WD-Asym36	3.21644	3
	1	WD-Asym37	3.22192	2
1		WD-Asym38	3.22466	5
1		WD-Asym39	3.27397	3
1		WD-Asym40	3.31233	27.5
1		WD-Asym41	3.31781	12
1		WD-Asym42	3.3589	4
	1	WD-Asym43	3.37808	5
1		WD-Asym44	3.40274	3.5
	1	WD-Asym45	3.40548	2
1		WD-Asym46	3.42192	2.3
	1	WD-Asym47	3.42466	5.3
1		WD-Asym48	3.48493	20.4
	1	WD-Asym49	3.53425	5.4
1		WD-Asym50	3.53699	3
1		WD-Asym51	3.5863	7
	1	WD-Asym52	3.60274	3
1		WD-Asym53	3.60548	9
1		WD-Asym54	3.60548	3.1
	1	WD-Asym55	3.6411	2
1		WD-Asym56	3.64658	10.5
1		WD-Asym57	3.65205	3
1		WD-Asym58	3.65479	21
1		WD-Asym59	3.65753	11
1		WD-Asym60	3.68493	4
1		WD-Asym61	3.72329	3
	1	WD-Asym62	3.76438	7.2
1		WD-Asym63	3.83014	6
	1	WD-Asym64	3.85479	2
	1	WD-Asym65	3.86027	2.8
	1	WD-Asym66	3.86301	2
1		WD-Asym67	3.88767	2
1		WD-Asym68	3.89863	2
1		WD-Asym69	3.90959	5
1		WD-Asym70	3.91781	2
	1	WD-Asym71	3.92329	2
1		WD-Asym72	3.93151	3
	1	WD-Asym73	3.96438	3
1		WD-Asym74	4.00274	4
1		WD-Asym75	4.00548	2.8
1		WD-Asym76	4.03014	5
	1	WD-Asym77	4.0411	5
1		WD-Asym78	4.06301	3
	1	WD-Asym79	4.07945	5
1		WD-Asym80	4.09041	2
	1	WD-Asym81	4.14247	4.4
	1	WD-Asym82	4.14521	2
1		WD-Asym83	4.14521	2
	1	WD-Asym84	4.14795	8.4
	1	WD-Asym85	4.16986	2
	1	WD-Asym86	4.21096	6
	1	WD-Asym87	4.21096	2
1		WD-Asym88	4.2137	3
	1	WD-Asym89	4.22192	5
1		WD-Asym90	4.2274	4.6
1		WD-Asym91	4.23014	3.8
	1	WD-Asym92	4.23562	3.1
1		WD-Asym93	4.26027	2
	1	WD-Asym94	4.27123	4
1		WD-Asym95	4.27123	4
1		WD-Asym96	4.29589	21
1		WD-Asym97	4.30685	3.8
1		WD-Asym98	4.35342	3
1		WD-Asym99	4.40548	4
	1	WD-Asym100	4.41096	3.8
	1	WD-Asym101	4.41096	16.3
1		WD-Asym102	4.45753	3.2
1		WD-Asym103	4.47397	6.9
	1	WD-Asym104	4.51233	3
	1	WD-Asym105	4.52329	8
	1	WD-Asym106	4.53699	3
1		WD-Asym107	4.57534	13
1		WD-Asym108	4.58082	3
1		WD-Asym109	4.58904	4
1		WD-Asym110	4.59726	5.59
	1	WD-Asym111	4.60822	3
	1	WD-Asym112	4.62466	14
	1	WD-Asym113	4.62466	2
	1	WD-Asym114	4.67945	2
	1	WD-Asym115	4.68219	2
	1	WD-Asym116	4.68493	3
	1	WD-Asym117	4.70959	5
1		WD-Asym118	4.72329	6
1		WD-Asym119	4.74247	8
1		WD-Asym120	4.7863	5
	1	WD-Asym121	4.78904	4.1
	1	WD-Asym122	4.79452	5.6
	1	WD-Asym123	4.80548	2
	1	WD-Asym124	4.83014	2
	1	WD-Asym125	4.84384	3
1		WD-Asym126	4.84384	11
1		WD-Asym127	4.86575	12
1		WD-Asym128	4.87671	11
	1	WD-Asym129	4.92055	19
1		WD-Asym130	4.92055	6
1		WD-Asym131	5	3
1		WD-Asym132	5	13
1		WD-Asym133	5.01096	3
1		WD-Asym134	5.04932	2
1		WD-Asym135	5.05753	3
1		WD-Asym136	5.06301	5
	1	WD-Asym137	5.06575	2.9
1		WD-Asym138	5.07397	5
1		WD-Asym139	5.07945	3
1		WD-Asym140	5.09041	3
1		WD-Asym141	5.11781	5
	1	WD-Asym142	5.15342	2
1		WD-Asym143	5.15342	14
1		WD-Asym144	5.16438	2.7
1		WD-Asym145	5.16712	2.4
1		WD-Asym146	5.18082	3
1		WD-Asym147	5.19178	19
	1	WD-Asym148	5.2	3.1
	1	WD-Asym149	5.2274	3
	1	WD-Asym150	5.29863	6
	1	WD-Asym151	5.33425	3
1		WD-Asym152	5.3863	2.9
1		WD-Asym153	5.38904	10
1		WD-Asym154	5.43836	4
1		WD-Asym155	5.4411	23
1		WD-Asym156	5.44932	2.3
1		WD-Asym157	5.52329	6
1		WD-Asym158	5.52877	26
1		WD-Asym159	5.53151	2
1		WD-Asym160	5.55616	6
1		WD-Asym161	5.56164	7
1		WD-Asym162	5.65753	14
1		WD-Asym163	5.71233	12.3
1		WD-Asym164	5.72329	3
1		WD-Asym165	5.73151	2
1		WD-Asym166	5.76438	7
	1	WD-Asym167	5.79726	2
1		WD-Asym168	5.8137	5.1
1		WD-Asym169	5.85205	5.8
	1	WD-Asym170	5.87397	2
1		WD-Asym171	5.87945	4
	1	WD-Asym172	5.88767	14.4
1		WD-Asym173	5.91781	8
	1	WD-Asym174	5.92055	4
1		WD-Asym175	5.92329	10
1		WD-Asym176	5.9863	2.8
1		WD-Asym177	5.98904	7
	1	WD-Asym178	6	2
1		WD-Asym179	6.06575	2
	1	WD-Asym180	6.06849	6
1		WD-Asym181	6.07945	6
1		WD-Asym182	6.10411	3.3
	1	WD-Asym183	6.15342	2.5
1		WD-Asym184	6.22466	2
	1	WD-Asym185	6.29863	2
1		WD-Asym186	6.30959	2
1		WD-Asym187	6.34521	18
	1	WD-Asym188	6.34795	2
1		WD-Asym189	6.36438	3
	1	WD-Asym190	6.36986	4
	1	WD-Asym191	6.37534	14
1		WD-Asym192	6.37808	3
1		WD-Asym193	6.37808	14
1		WD-Asym194	6.39452	7
	1	WD-Asym195	6.43562	2
1		WD-Asym196	6.47123	14
1		WD-Asym197	6.53151	2
1		WD-Asym198	6.53425	2
1		WD-Asym199	6.55342	3
1		WD-Asym200	6.6	5.3
1		WD-Asym201	6.6137	7.8
	1	WD-Asym202	6.67671	2
1		WD-Asym203	6.7726	5
1		WD-Asym204	6.87945	8.6
1		WD-Asym205	6.92329	9
	1	WD-Asym206	6.95342	3
	1	WD-Asym207	6.99452	2.3
	1	WD-Asym208	7.01644	2
1		WD-Asym209	7.02192	3
	1	WD-Asym210	7.04384	2.8
1		WD-Asym211	7.04658	10.1
	1	WD-Asym212	7.05479	11
	1	WD-Asym213	7.13151	3
	1	WD-Asym214	7.23288	13
1		WD-Asym215	7.25479	4
	1	WD-Asym216	7.30411	6
1		WD-Asym217	7.58082	3.5
	1	WD-Asym218	7.58904	6
	1	WD-Asym219	7.6411	4
1		WD-Asym220	7.6411	3
1		WD-Asym221	7.69863	2.1
1		WD-Asym222	7.73151	14
1		WD-Asym223	7.81918	2
	1	WD-Asym224	7.8411	2
	1	WD-Asym225	7.92877	7.2
1		WD-Asym226	7.93973	4.9
1		WD-Asym227	7.99178	5.8
1		WD-Asym228	8.00548	15.1
1		WD-Asym229	8.07397	3.3
1		WD-Asym230	8.30959	5
1		WD-Asym231	8.3726	18
1		WD-Asym232	8.38082	2
1		WD-Asym233	8.41096	2
1		WD-Asym234	8.5589	7
1		WD-Asym235	8.58356	2
1		WD-Asym236	8.74521	2.2
	1	WD-Asym237	8.78082	5
	1	WD-Asym238	8.84658	2
1		WD-Asym239	9.10959	7
1		WD-Asym240	9.61918	2
1		WD-Asym241	9.99726	2
1		WD-Asym242	10	2
	1	WD-Asym243	10.0685	2.44
	1	WD-Asym244	10.0849	5
1		WD-Asym245	10.1973	9
1		WD-Asym246	10.3534	9
1		WD-Asym247	10.4411	4
1		WD-Asym248	10.8849	16.7
1		WD-Asym249	10.9178	4
1		WD-Asym250	11.0219	5
1		WD-Asym251	11.2822	4.8
	1	WD-Asym252	11.5534	7
	1	WD-Asym253	11.7507	4
1		WD-Asym254	12.7041	8
	1	WD-Asym255	13.3836	2
1		WD-Asym256	14.2685	2

## Sheet: WD-Acute liver failure
Male	Female	Name	Age (years)	CER（mg/dL)
1		WD-ALF1	6.00548	2
	1	WD-ALF2	6.2	19
1		WD-ALF3	6.52055	10.6
1		WD-ALF4	6.6	13
1		WD-ALF5	7.3	12
	1	WD-ALF6	8.21918	6.7
1		WD-ALF7	8.75342	12
	1	WD-ALF8	8.9	7
1		WD-ALF9	9.32055	3.9
1		WD-ALF10	9.89315	3
	1	WD-ALF11	10.3397	15
1		WD-ALF12	10.5699	8
	1	WD-ALF13	11.1123	11
	1	WD-ALF14	12.8959	4
	1	WD-ALF15	13.0904	12.3

## Sheet: WD-Acute hepatitis
Male	Female	Name	Age (years)	CER（mg/dL)
	1	WD-AH1	1.3	2
1		WD-AH2	5.20548	2
1		WD-AH3	7.33699	4
1		WD-AH4	7.54795	3
	1	WD-AH5	10.8411	10
1		WD-AH6	12.6411	5
1		WD-AH7	9.8	12

## Sheet: WD-Chronic liver disease
Male	Female	Name	Age (years)	CER（mg/dL)
1		WD-C1	6.56438	7
1		WD-C2	6.7	18
	1	WD-C3	8	14.7
1		WD-C4	8.8	3.1
	1	WD-C5	8.8	2.4
	1	WD-C6	9.18082	18.8
1		WD-C7	9.2	9
	1	WD-C8	10.4	2
1		WD-C9	10.5	4
1		WD-C10	11.2822	9
1		WD-C11	11.9753	2
1		WD-C12	12.4	3
	1	WD-C13	12.6164	12
1		WD-C14	12.8	4
	1	WD-C15	11.6	11

## Sheet: WD-Neurological disease
Male	Female	Name	Age (years)	CER（mg/dL)
1		WD-N1	7.33425	5.1
1		WD-N2	8.0137	4.4
	1	WD-N3	8.6411	4
1		WD-N4	10.5	11
	1	WD-N5	10.5	4
1		WD-N6	12.1781	3
1		WD-N7	12.2192	2
1		WD-N8	12.2603	3
1		WD-N9	12.3781	3
1		WD-N10	12.4164	3
1		WD-N11	13.6	5
1		WD-N12	9.5	14

## Sheet: WD-Renal disease
Male	Female	Name	Age (years)	CER（mg/dL)
1		WD-R1	5.06849	5
1		WD-R2	6.3	2
1		WD-R3	9.4	5
1		WD-R4	10	3
	1	WD-R5	12.4247	11.1

## Sheet: WD-Purpura
Male	Female	Name	Age (years)	CER（mg/dL)
	1	WD-Pur1	6.26575	3.6
	1	WD-Pur2	11.0164	2.1

## Sheet: non-WD-Acute liver failure
Male	Female	Name	Age (years)	CER（mg/dL)
	1	Non-WD-ALF1	0.08	56
1		Non-WD-ALF2	0.25	13
1		Non-WD-ALF3	0.33	47
1		Non-WD-ALF4	0.58	10
1		Non-WD-ALF5	0.71	26.7
1		Non-WD-ALF6	0.75	48
	1	Non-WD-ALF7	0.9	27.2
1		Non-WD-ALF8	0.92	37.4
	1	Non-WD-ALF9	0.92	17
1		Non-WD-ALF10	1	20.6
	1	Non-WD-ALF11	1	12.4
1		Non-WD-ALF12	1.5	22.5
1		Non-WD-ALF13	1.92	33
	1	Non-WD-ALF14	2	20.7
1		Non-WD-ALF15	2.08	18
	1	Non-WD-ALF16	2.84	44
1		Non-WD-ALF17	6	18
	1	Non-WD-ALF18	7	28
	1	Non-WD-ALF19	11	22
	1	Non-WD-ALF20	13	26

## Sheet: non-WD-Viral hepatitis
Male	Female	Name	Age (years)	CER（mg/dL)
1		Non-WD-V1	0.1	38
1		Non-WD-V2	0.5	27
	1	Non-WD-V3	0.58	36
	1	Non-WD-V4	0.58	25.3
1		Non-WD-V5	0.84	26
1		Non-WD-V6	0.92	12.1
	1	Non-WD-V7	0.95	29
	1	Non-WD-V8	1	35.9
1		Non-WD-V9	1.25	32.9
	1	Non-WD-V10	1.75	33
1		Non-WD-V11	1.84	31
	1	Non-WD-V12	2.33	57
1		Non-WD-V13	2.58	42
	1	Non-WD-V14	2.58	35
1		Non-WD-V15	2.75	39.9
1		Non-WD-V16	2.92	44
1		Non-WD-V17	2.92	37
1		Non-WD-V18	3	28
1		Non-WD-V19	3	27.9
	1	Non-WD-V20	3	30.8
1		Non-WD-V21	3.25	32
1		Non-WD-V22	3.33	32
1		Non-WD-V23	3.5	17
1		Non-WD-V24	3.58	37
1		Non-WD-V25	4	32
	1	Non-WD-V26	4	35.5
1		Non-WD-V27	4.75	39
1		Non-WD-V28	5	26
	1	Non-WD-V29	5	38.6
1		Non-WD-V30	5.75	33
1		Non-WD-V31	5.92	35
1		Non-WD-V32	6.08	31
	1	Non-WD-V33	6.84	27
	1	Non-WD-V34	8	43
	1	Non-WD-V35	8	34
1		Non-WD-V36	10	18
1		Non-WD-V37	12	24.4
	1	Non-WD-V38	15.33	31

[truncated: 1 more sheets: non-WD-Nephrotic syndrome]
